1

## Resilience to Acidification of a Coral Holobiont

# Transcriptomic Resilience of a Coral Holobiont to Low pH

1Raúl A. González-Pech<sup>1,2,§</sup>, Sergio Vargas<sup>1</sup>, Warren R. Francis<sup>1</sup>, Gert Wörheide<sup>1,3,4\*</sup>

2<sup>1</sup>Department of Earth and Environmental Science, Palaeontology & Geobiology, Ludwig-  
3Maximilians-Universität München, Munich, Germany.

4<sup>2</sup>Munich Graduate School for Evolution, Ecology and Systematics, Faculty of Biology,  
5Ludwig-Maximilians-Universität München, Planegg-Martinsried, Germany.

6<sup>3</sup>Bavarian State Collections of Palaeontology and Geology, Munich, Germany.

7<sup>4</sup>GeoBio-CenterLMU, Ludwig-Maximilians-Universität München, Munich, Germany.

8§ Present address: Institute for Molecular Bioscience, The University of Queensland,  
9Brisbane, QLD 4072, Australia

10\* **Correspondence:**

11Gert Wörheide

12[woerheide@lmu.de](mailto:woerheide@lmu.de)

13

14**Keywords: gene expression, ocean acidification, coral, holobiont, resilience.**

15

## 16Abstract

17Ocean acidification is considered as one of the major threats for coral reefs at a global scale.

18Marine calcifying organisms, including stony corals, are expected to be the most affected by

19the predicted decrease of the surface water pH at the end of the century. The severity of the

20impacts on coral reefs remains as matter of controversy. Although previous studies have

21explored the physiological response of stony corals to changes in pH, the response of the

22holobiont (i.e. the coral itself plus its symbionts) remains largely unexplored. In the present

23study, we assessed the changes in overall gene expression of the coral *Montipora digitata* and

24its microalgal symbionts after a short (three days) and a longer (42 days) exposure to low pH

25(7.6). The short-term exposure to low pH caused small differences in the expression level of

26the host, impacting mostly genes associated with stress response in other scleractinians.

3

## Resilience to Acidification of a Coral Holobiont

27 Longer exposure to low pH resulted in no significant changes in gene expression of the coral  
28 host. Gene expression in the eukaryotic symbionts remained unaltered at both exposure times.  
29 Our findings suggest resilience, in terms of gene expression, of the *Montipora digitata*  
30 holobiont to pH decrease, as well as capability to acclimatize to extended periods of exposure  
31 to low pH.

32

### 331 Introduction

34 Ocean acidification, the decreasing pH of ocean surface waters, is considered a global threat  
35 to coral reefs (Hoegh-Guldberg et al., 2007). A Business-as-Usual (BaU) carbon emissions  
36 scenario predicts surface water pH should reach values ranging between 7.8 and 8.0 by the  
37 end of the century, likely posing a challenging future for marine calcifying organisms  
38 (Kleypas et al., 2005; Jokiel et al., 2008; De'ath et al., 2009). Among these organisms,  
39 scleractinian corals have received particular attention due to their pivotal role as reef builders  
40 (Shinzato et al., 2011). In this regard, ocean acidification has the potential to decrease reef-  
41 accretion rates and negatively impact these important ecosystems that serve as biodiversity  
42 reservoirs, allow the development of other marine ecosystems, and provide important  
43 economic and environmental services (Moberg and Folke, 1999; Chen et al., 2015).

44 The mechanisms by which exposure to acidified water affect calcium carbonate accretion in  
45 corals appears to be related to the maintenance of pH-homeostasis at the tissue-skeleton  
46 interface, which allegedly makes calcification more energetically expensive (Krief et al.,  
47 2010; McCulloch et al., 2012; Venn et al., 2013; Holcomb et al., 2014; Cyronak et al., 2015,  
48 Von Euw et al., 2017). Other observed physiological changes triggered by low pH include  
49 impaired reproduction, growth and metabolic functions, and anomalies in skeletal  
50 morphology (Albright et al., 2008; Albright et al., 2010; Morita et al., 2010; Suwa et al., 2010;

51Albright and Langdon, 2011; Nakamura et al., 2011). Symbiosis can also be affected as coral  
52bleaching can be triggered by ocean acidification (Anthony et al., 2008). In addition,  
53decreased photosynthetic productivity has been reported in *Symbiodinium* (the microalgal  
54symbiont inhabiting corals) exposed to low pH water, and a delayed establishment of  
55symbiosis has been observed in coral larvae exposed to this condition (Anthony et al., 2008;  
56Crawley et al. 2010). However, the impacts of exposing corals to low pH vary across species  
57and life stages (Kaniewska et al., 2012; Moya et al., 2012; Moya et al., 2015; Davies et al.,  
582016).

59Previous findings suggest that corals can tolerate low pH by using different strategies, for  
60example, through the reduction of their metabolic rate and oxygen consumption (in larvae) or  
61by increasing calcification rates (in adults) (Nakamura et al., 2011; Rodolfo-Metalpa et al.,  
622011). Better characterization of the responses of these organisms to ocean acidification is  
63therefore fundamental in order to better understand the potential of scleractinian corals to  
64cope with the challenges associated with a changing environment. Within this framework, we  
65sequenced the transcriptome of *Montipora digitata*, a coral commonly found in seawater  
66aquaria and available in culture in different countries, and of its symbiotic microalgae and  
67assessed the changes in global gene expression as result of exposing *M. digitata* to low (7.6)  
68pH water for 3 and 42 days. To date, most studies have focused on the physiological response  
69of stony corals to changes in pH, leaving the coupled transcriptional response of corals and  
70their symbionts to ocean acidification largely unexplored. Here we show that the *M. digitata*  
71holobiont is remarkably tolerant to low pH water exposure, highlighting the potential for  
72resilience and acclimation of corals to ocean acidification.

## 732 **Methods**

### 742.1 **Experimental setup and biological material**

75The experimental setup consisted of two tanks (control and treatment), each of them  
76containing 20 L of artificial seawater coming from one of the (360 L) aquarium systems  
77available at the Molecular Geo- & Palaeobiology Laboratory of the Department of Earth and  
78Environmental Sciences, Palaeontology & Geobiology, LMU München (Supplementary Fig.  
79S1). Water in the experimental tanks was replaced 3 to 5 times per hour with water from the  
80main (360 L) tank. To simulate ocean acidification conditions, a pH-electrode (LE4099,  
81Mettler Toledo) connected to a pH computer was used to control the injection of CO<sub>2</sub> into the  
82water of the treatment tank to be kept pH at 7.6 (treatment tank). In each experimental tank a  
83water pump set to a flow rate of 300 L/h was used to keep the water circulating and to better  
84mix the CO<sub>2</sub> injected into the treatment tank. Water returning from the treatment tank was  
85equilibrated to pH ~8.0 by letting it flow through a 25 cm column containing limestone grains  
86with diameters ranging from 2 to 5 mm and simultaneously injecting air (300 to 500 L/h).  
87After this, the treated water was mixed with the remaining water in the main (360 L) tank.  
88Both tanks were illuminated using a Mitras LX 6200-HV lamp simulating tropical light  
89cycles; illuminance ranged between 19 and 22 kilolux at the seawater surface of both tanks.  
90During the experiment, water pH in each experimental tank was controlled every day and was  
91recorded every hour from the second day onwards with a pH electrode LE4099 Mettler  
92Toledo and a pH-meter PCE-PHD 1. During the experiment, the pH of the treatment tank was  
93relatively constant (mean = 7.64, sd = 0.02), while the pH in the control aquarium fluctuated  
94between 7.90 and 8.26 according to the respiration/photosynthesis cycle of corals and  
95symbionts (mean = 8.08, sd = 0.11).

96Coral nubbins (n = 20) were obtained from branches of two adult *Montipora digitata* colonies  
97from our coral culture stock. The individual explants were cultured for over 2 months in the  
98main (360 L) aquarium under the same light conditions used for the experiment.

99Approximately one month before starting the pH experiment, the nubbins were transferred to  
100the control aquarium of the experimental setup (see above) for acclimation. Afterwards, half  
101of the corals were moved to the treatment tank and sampling was conducted after 3 and 42  
102days of exposure. Five corals were sampled from each tank at each sampling time.

103

#### 104**2.2 RNA extraction and sequencing**

105At each sampling point, the nubbins were flash-frozen in liquid nitrogen, broken in smaller  
106pieces with mortar and pestle (always in liquid nitrogen) and stored at -80 °C until further  
107processing. For RNA extraction, samples were homogenized in TRIzol Reagent (Thermo  
108Fisher Scientific) with a SilentCrusher M and a Dispersion Tool 8 F (Heidolph) and total  
109RNA was extracted using a slightly modified version of the Chomczynski method  
110(Chomczynski and Sacchi, 1987). RNA quality and concentration were controlled with a  
111NanoDrop ND-1000 spectrometer and with a BioAnalyzer 2100 (Agilent Technologies, Santa  
112Clara, CA, USA). An additional cleaning step with Agencourt RNAClean XP Magnetic Beads  
113was done if required. RNA concentration and quality requirements for library preparation and  
114sequencing were achieved for all samples obtained after the first sampling time, for the  
115second sampling time only 6 samples (3 control + 3 treatment) met quality requirements and  
116were further used. Library preparation and sequencing (50bp PE; HiSeq2500) was done at the  
117GeneCore of the European Molecular Biology Laboratory (EMBL) in Heidelberg, Germany.  
118The reads generated for the second sampling time were strand-specific and further used for *de*  
119*novo* transcriptome assembly. The reads generated were uploaded to the Short Read Archive

11

## Resilience to Acidification of a Coral Holobiont

120of the European Nucleotide Archive under the project accession PRJEB21531

121(<http://www.ebi.ac.uk/ena/data/view/PRJEB21531>).

122

### 1232.3 Transcriptome assembly and annotation

124Illumina read pairs were quality controlled with FastQC v0.63 (Andrews, 2010), low quality  
125bases and reads were removed with Trimmomatic v0.32 (Bolger et al., 2014). The surviving  
126pairs were further processed with the program Filter Illumina v0.40 of the Agalma/Biolite  
127suite (Dunn et al., 2013) to ensure the removal of adapters and low quality reads. Reads from  
128putative bacterial contaminants were filtered out by aligning the surviving pairs against all  
129bacterial genomes on RefSeq as of July 2015

130(<ftp://ftp.ncbi.nlm.nih.gov/genomes/refseq/bacteria>) and discarding mapping pairs.

131De novo transcriptome assembly was done with Trinity v2.0.6 using only strand-specific  
132sequences (*i.e.* the surviving read pairs from the second sampling time) (Grabherr et al.,  
1332011). The assembled contigs from coral and dinoflagellates were separated with Psytrans  
134(<https://github.com/sylvainforet/psytrans>) using the *Acropora digitifera* v0.9 (Shinzato et al.,  
1352011) and *Symbiodinium minutum* Clade B1 v1.0 (Shoguchi et al., 2013) predicted proteins as  
136references. The minicircle sequences of *Symbiodinium* sp. Chloroplast (Barbrook et al., 2014)  
137were recovered manually from the contigs assigned to the coral. Coding sequences (CDS)  
138from the assembled transcripts were predicted with TransDecoder v2.0.1

139(<https://transdecoder.github.io>). Only transcripts with predicted proteins were used as the  
140reference transcriptome for both coral and symbionts. Completeness of the transcriptomes  
141was assessed by search of the sequences against the Core Eukaryotic Genes Dataset  
142(CEGMA) (Parra et al., 2007; Francis et al., 2013). Data processing and transcriptome  
143assembly were mostly executed on the Molecular Geo- and Paleobiology Lab's Galaxy server

144(Goecks et al., 2010). Differentially expressed genes (DEGs hereafter) were annotated by  
145BLASTN ( $E = 10^{-10}$ ) against the Non-Redundant (nr) database of the NCBI and by BLASTX  
146( $E = 10^{-10}$ ) against the SwissProt database (both downloaded in February 2015). The best  
147SwissProt hit of each DEG was used to retrieve its associated Gene Ontology terms through  
148the QuickGO online tool (<https://www.ebi.ac.uk/QuickGO>). In addition, predicted proteins of  
149the DEGs were annotated with the protein identifiers of the *Acropora digitifera* v0.9 and  
150*Symbiodinium minutum* Clade B1 v1.2 by BLASTP ( $E = 10^{-10}$ ). A Galaxy history containing  
151some of the steps previously mentioned can be accessed at (XXXXXXX). The transcriptome  
152annotations can be found in [https://github.com/PalMuc/Montipora\\_digitata\\_resources](https://github.com/PalMuc/Montipora_digitata_resources).

153

#### 1542.4 Differential gene expression analysis

155For each sampling time, the remaining reads from each sample were mapped with Bowtie2  
156(Langmead et al., 2009) to the reference transcriptomes of *M. digitata* and *Symbiodinium* sp.  
157Read counts from isoforms groups were added to derive a matrix of counts per Trinity-  
158component. Differences between conditions and colonies were assessed with the *adonis*  
159function of the *vegan* R library (Oksanen et al., 2013). As in other ocean acidification studies  
160(Davies et al., 2016; Kurman et al., 2017), the sample-dependence effect caused by one single  
161tank per condition could not be corrected (Riebesell et al., 2011; Cornwall and Hurd, 2016;  
162but see Oksanen, 2001 and Schank and Koehnle, 2009 for a discussion on pseudoreplication).  
163DEGs between conditions were detected using the package DESeq2 v1.8.1 (Love et al.,  
1642014). DEGs were selected by their significant change in expression as assessed by a Wald  
165test; P-values were adjusted with the Benjamini-Hochberg correction (Benjamini and  
166Hochberg, 1995). Gene Ontology (GO) terms enrichment was assessed with topGO v1.0  
167(Alexa and Rahnenfuhrer, 2010) in R v3.2.1. Protein domains of the DEG products were

15

## Resilience to Acidification of a Coral Holobiont

168 identified using PfamScan and PFAM A release 30.0 (both downloaded from

169 <ftp://ftp.ebi.ac.uk/pub/databases/Pfam/>). The counts and the R scripts used to analyze the data

170 can be found in the project repository

171 ([https://github.com/PalMuc/Montipora\\_digitata\\_resources](https://github.com/PalMuc/Montipora_digitata_resources)).

172

### 1733 Results

#### 1743.1 Reference transcriptomes

175 The *Montipora digitata* meta-transcriptome was assembled using over 190 million of strand-  
176 specific read pairs. The transcriptome assembly yielded 179,298 sequences, of which 123,710  
177 (69 %) were assigned to the coral host and 55,588 (31 %) to the symbiont. These transcript  
178 sets resulted in 41,852 and 34,057 predicted CDS for the coral and symbionts, respectively.  
179 The N50 length was 1,101 bp for the coral and 744 bp for *Symbiodinium* sp. G+C content of  
180 both reference transcriptomes were 43.9% and 54.5%, consistent with previous reports for the  
181 Order Scleractinia and *Symbiodinium* spp., respectively (Bayer et al., 2012; Shoguchi et al.,  
182 2013; Sun et al., 2013; Shinzato et al., 2014). Summary quality statistics for both  
183 transcriptomes are summarized in Table 1. Most of the Core Eukaryotic Genes (CEGs) were  
184 found in the transcriptomes, 89.5% in *M. digitata* and 79.4% in *Symbiodinium* sp.  
185 (Supplementary Table S1). In addition, the level of fragmentation of the assembled  
186 transcriptomes appears to be low as judged by the low number of CEGs that are longer than  
187 the queries.

**Table 1.** Summary quality statistics for the reference transcriptomes of the *M. digitata* and *Symbiodinium* sp.

| Statistic  | <i>Montipora digitata</i> Transcriptome | <i>Symbiodinium</i> sp. Transcriptome |
|------------|-----------------------------------------|---------------------------------------|
| GC content | 43.9 %                                  | 54.5 %                                |



17

## Resilience to Acidification of a Coral Holobiont

|                    |            |            |
|--------------------|------------|------------|
| N50 (bp)           | 1,101      | 744        |
| Max. length (bp)   | 10,503     | 6,318      |
| Mean length (bp)   | 872        | 648        |
| Median length (bp) | 645        | 540        |
| Min. length (bp)   | 297        | 297        |
| Total length (bp)  | 36,510,222 | 22,095,753 |
| Num. of sequences  | 41,852     | 34,057     |

188

189 Only 5,541 (13.2%) out of the 41,852 genes contained in the transcriptome of *M. digitata*  
190 transcriptome could not be annotated with any of the databases. A large portion (48.6%) of  
191 transcripts had hits against sequences from all of the three databases used and about 15% of  
192 the total transcripts hit exclusively sequences of the *A. digitifera* genome (Fig. 1). On the  
193 other hand, most of the sequences in the transcriptome of *Symbiodinium* sp. were annotated  
194 with genes from the *S. minutum* genome (85.5% of all transcripts), and almost half of them  
195 (48.4%) had hits exclusively against this genome. Similarly to the coral transcriptome, only a  
196 small fraction of the transcripts (12.9%) lacked any annotation (Fig. 1).

197

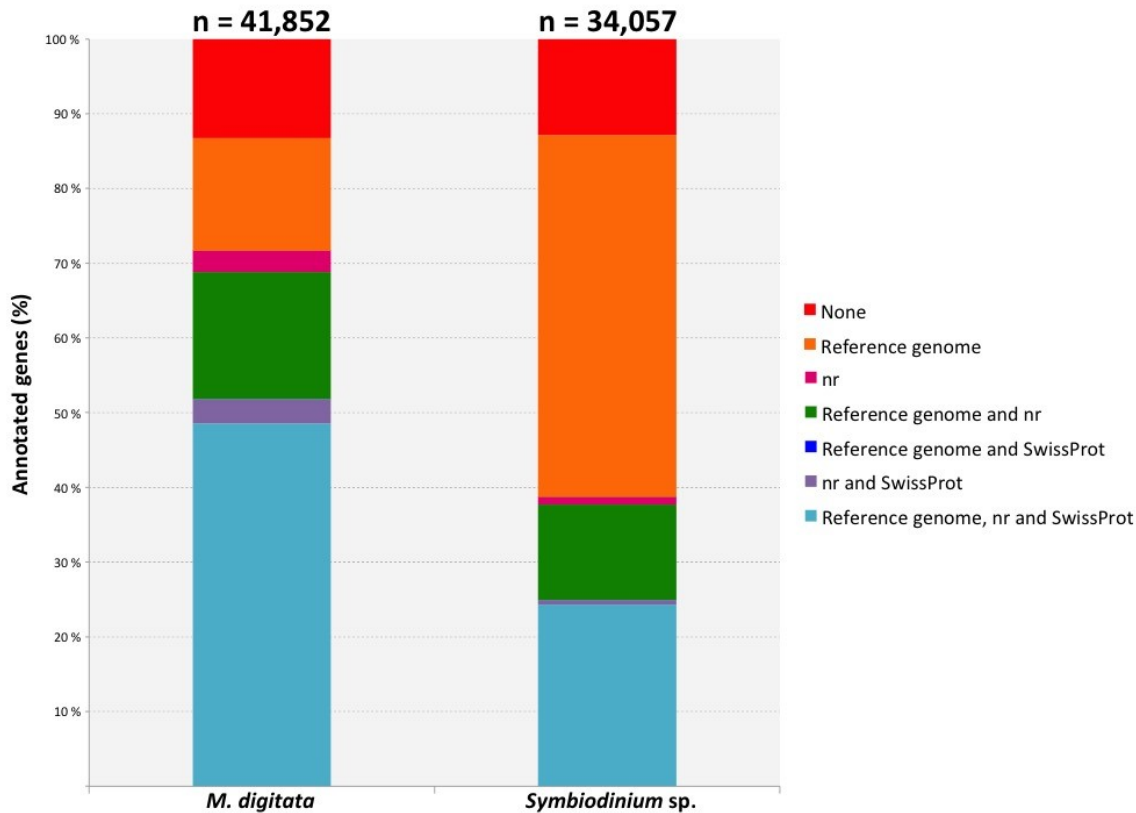

Fig

**Figure 1.** Bar plot displaying different fractions of the annotations for both, coral and symbiont, transcriptomes. The total number of genes for each transcriptome is shown above the corresponding bar. Each color represents an annotation category specified in the legend on the right and the lines connecting the bars indicate the position of the same category for each dataset. The category with the largest fraction in the coral transcriptome corresponds to those genes that had records from the three annotation resources. Genes with no annotation records are shown in red and represent a minor fraction of each transcriptome. Reference genomes used were *Acropora digitifera* (scleractinian coral) and *Symbiodinium minutum* (dinoflagellate symbiont).

### 1983.2 Coral response to low pH

199 No significant differences in global expression were found with the *adonis* exploratory test  
200 between conditions and between colonies for neither the short ( $p_{\text{condition}} = 0.40$ ,  $p_{\text{colony}} = 0.19$ )  
201 nor the longer ( $p_{\text{condition}} = 0.73$ ,  $p_{\text{colony}} = 0.76$ ) exposures of the coral to low pH. These findings  
202 are also supported by the variance in expression of the coral genes at both sampling times  
203 (Fig. 2) and by the variance-corrected counts of mapped reads per gene per sample  
204 (Supplementary Fig. S2).

205

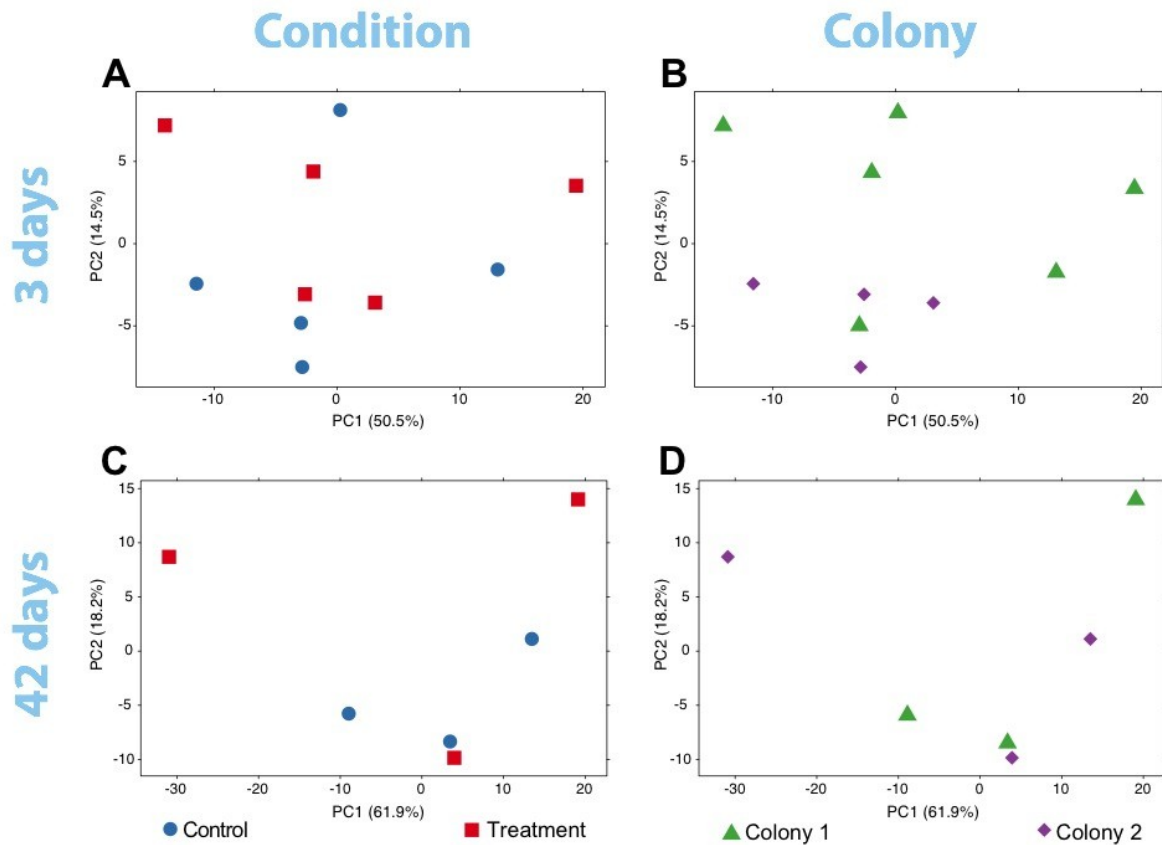

**Fig. 2** PCA plots of the variance of expressed genes in the coral nubbins (A) between colonies and (B) conditions after three days of exposure to low pH. Variance of gene expression is also plotted after the 42-days exposure comparing conditions (C) and colonies (D). No grouping patterns in any comparison can be distinguished. Dot color and shape codes are displayed at the bottom.

206

207 Still, the DeSeq2 gene expression analysis yielded 18 genes with significant ( $p_{adj} < 0.05$ )

208 differences in expression level due to exposure to low pH after three days (model design: ~

209 colony + condition). The  $\log_2$ -fold changes for these genes ranged between -0.70 and 0.73

210 (Supplementary Table 1). Six up- and 12 downregulated genes were found. From the six

211 upregulated genes, two (including a metalloprotease) contain zinc-binding domains and others

212 have RNA/DNA binding domains. Among the downregulated genes, proteins similar to

213 Noelin, to an  $\alpha$ B-crystallin and to a “platelet-derived” growth factor were found. A protein

214 with no annotation but containing a domain of the tumor necrosis factor receptor superfamily

215 (TNFR) was also downregulated. GO terms related to organ development, cell differentiation

216 and cell chemotaxis were enriched in this set of genes (Supplementary Table S2). Upregulated

217 genes were rich in GO terms related to the negative regulation of calcium ion-dependent  
218 exocytosis, regulation of extracellular matrix assembly, collagen catalysis, changes in bone  
219 morphogenesis, negative regulation of cell-substrate adhesion, transmembrane transport of  
220 zinc and response to antigenic stimulus. Additionally, the Notch-signaling pathway appeared  
221 to be positively regulated, contrary to previous findings (Kaniewska et al., 2012). No DEGs  
222 were found in the coral after 42 days of exposure to low pH.

223

### 224 3.3 Symbiont response to low pH

225 The exploratory analyses of gene expression of *Symbiodinium* sp. suggest no change at any  
226 sampling time (Fig. 4). The *adonis* permutation test resulted in no significant differences  
227 between conditions and colony after the first ( $p_{\text{condition}} = 0.62$ ,  $p_{\text{colony}} = 0.78$ ) or the second  
228 ( $p_{\text{condition}} = 0.88$ ,  $p_{\text{colony}} = 0.99$ ) exposure period. No DEGs were found at any time.

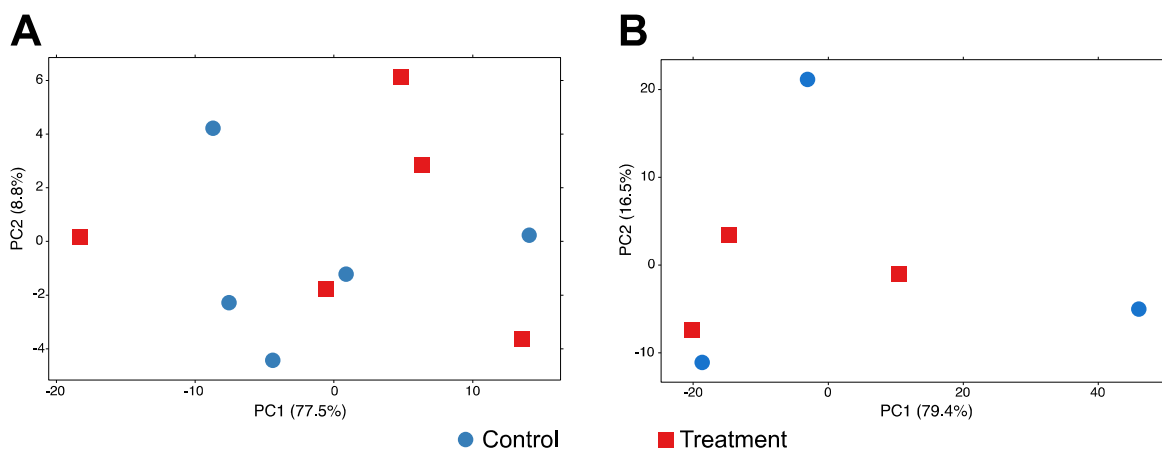

**Fig. 2** PCA plots of the variance of expressed genes in the symbionts after three (A) and 42 (B) days of exposure to low pH. No grouping patterns at any time can be distinguished. Dot color and shape codes are displayed at the bottom.

## 2294 Discussion

### 2304.1 Mild stress response of the coral to low pH

231 The present study used RNA-Seq to assess the coupled response of an adult stony coral  
232 (*Montipora digitata*) and its microalgal symbionts to low pH. Compared to previous

233 investigations (Kaniewska et al., 2012; Moya et al., 2012; Moya et al., 2015), our results  
234 suggest a mild gene expression response of the adult coral holobiont to a three-days exposure  
235 to acidified water in terms of number of DEGs and log<sub>2</sub>-fold change. Still, the log<sub>2</sub>-fold  
236 changes we found in this study are comparable to those observed in the resilient coral  
237 *Siderastrea siderea* under laboratory-induced ocean acidification conditions (Davies et al.,  
238 2016). This suggests resilience of *M. digitata* to low pH.

239 The few DEGs found after short-term exposure of *M. digitata* to low pH (7.6) have been  
240 shown to be involved in stress response in corals. Zinc-metalloproteases, for instance, seem to  
241 be relevant for heat tolerance in these organisms and might play a role in regulation of  
242 apoptosis and cell repair (Barshis et al., 2013). Other stress related genes were found among  
243 the significantly downregulated genes, like the  $\alpha$ B-crystallin-like protein, an HSP20 family  
244 member.  $\alpha$ B-crystallin seems to play a role in stress response in other corals (e.g. *Orbicella*  
245 *annularis* and *O. faveolata*), but its exact function is yet unknown (Downs et al., 2002). A  
246 TNFR domain-containing protein is another example, and changes in expression levels of  
247 proteins carrying this type of domain display have been found in other corals under stress  
248 conditions (Barshis et al., 2013; Seneca and Palumbi, 2015; Yuan et al., 2017). Another down-  
249 regulated gene codes for a protein containing a platelet-derived growth factor domain, though  
250 the regulation of this kind of protein upon exposure to low pH has not been previously  
251 reported in corals. However, it is already known that homologs of human bone-  
252 morphogenesis proteins (BMP2/4) participate in skeleton production of marine calcifiers,  
253 including corals (Green et al., 2013). In fact, proteins carrying this domain are currently used  
254 for bone regeneration in humans, and its use, in combination with coral skeleton, has been  
255 proposed to treat bone defects (Parizi et al., 2012).

256 According to previous investigations, coral larvae are able to acclimate to acidified water  
257 within a few-days time span (Moya et al., 2015). Such a rapid acclimation by the adult coral

27

## Resilience to Acidification of a Coral Holobiont

258 holobiont would thus explain the lack of change in gene expression after 42 days of acidified  
259 water exposure in our experiments, a time by which acclimation would likely have been  
260 already completed. Our findings in the long-term response are similar to a previous  
261 investigation on response of another adult scleractinian (*Acropora millepora*) to a 37-days  
262 exposure to low pH (elevated pCO<sub>2</sub>) that reported absence of change in the expression of  
263 target genes associated with calcification and metabolism (Rocker et al., 2015). In agreement  
264 with this, previous studies suggest that temperature stress has a greater impact in gene  
265 expression of corals than pH (Mayfield et al., 2014; Davies et al., 2016), although resilience  
266 to stress conditions varies from one species to another (Loya et al., 2001).

267

### 2684.2 Symbiont response

269 Physiological response to stress conditions does not only depend on coral host resilience but  
270 also on the interaction with its symbionts (Hoadley et al., 2015). In the present study,  
271 *Symbiodinium* sp. did not seem to be affected by the decrease of pH, possibly because of the  
272 more stable environment provided by the coral tissue, which acts as some kind of protection  
273 for the algae (Banaszak and Trench, 1996). However, differences in response between  
274 *Symbiodinium* spp. *in hospite* and isolated from the host to environmental stressors remain  
275 largely unexplored.

276

### 2775 Conclusions

278 Here we provide baseline data in the form of a reference transcriptome of the scleractinian  
279 coral *Montipora digitata* and its dinoflagellate symbiont. We used these data to assess changes  
280 in overall gene expression of the different components of the coral holobiont, i.e., the coral  
281 host and its microalgal symbionts after different periods of exposure to low pH (7.6) seawater.

29

## Resilience to Acidification of a Coral Holobiont

282 While the coral host showed an initial stress response after short-term exposure to low pH, an  
283 acclimatization of gene expression levels was indicated after longer exposure (42 days) to low  
284 pH, whereas its symbionts remained unaffected independent of exposure times. While we  
285 cannot exclude tank effects due to the experimental set-up, these findings nonetheless suggest  
286 a potential of the *Montipora digitata* holobiont for acclimatization and resilience to lowered  
287 seawater pH, and that temperature may play a greater role in coral stress than pH. Both the  
288 reference transcriptome we provide and the working hypothesis of acclimatization and  
289 resilience in this model system serve as a valuable baseline for future in-depth experiments.

290

### 2916 Conflict of Interest

292 The authors declare that the research was conducted in the absence of any commercial or  
293 financial relationships that could be construed as a potential conflict of interest.

294

### 2955 Author Contributions

296 GW and SV conceived the study, SV coordinated the lab and analytical work, RGP carried out  
297 the experiments, lab work and analysed the data, WRF contributed to bioinformatic analyses,  
298 GW acquired the funding.

299

### 3006 Funding

301 This publication is the outcome of the Masters Thesis project of the first author, who was  
302 funded by the National Council of Science and Technology of Mexico (CONACYT) to pursue  
303 his studies at LMU. The study benefited from funding by LMU Munich's Institutional  
304 Strategy LMUexcellent within the framework of the German Excellence Initiative.

305

**3067 Acknowledgments**

307 This study would not have been possible without the support of Gabi Büttner, Simone  
308 Schätzle and of Dr. Peter Naumann. Dr. Michael Eitel provided important discussions about  
309 data analysis. We would also like to thank Dr. Helmut Blum, Dr. Stefan Krebs and Andrea  
310 Klanner, LAFUGA, Gene Center LMU München, for the support during early stages of  
311 laboratory work. We acknowledge Dr. Sylvain Foret for his help with Psytrans. SV is indebted  
312 to N. Villalobos Trigueros, M. Vargas Villalobos, S. Vargas Villalobos and S. Vargas  
313 Villalobos for their constant support.



## 3148     **References**

- 315 Albright, R., and Langdon, C. (2011). Ocean acidification impacts multiple early life history  
316         processes of the Caribbean coral *Porites astreoides*. *Global Change Biology* 17(7),  
317         2478-2487.
- 318 Albright, R., Mason, B., and Langdon, C. (2008). Effect of aragonite saturation state on  
319         settlement and post-settlement growth of *Porites astreoides* larvae. *Coral Reefs* 27(3),  
320         485-490.
- 321 Albright, R., Mason, B., Miller, M., and Langdon, C. (2010). Ocean acidification  
322         compromises recruitment success of the threatened Caribbean coral *Acropora*  
323         *palmata*. *Proceedings of the National Academy of Sciences* 107(47), 20400-20404.
- 324 Alexa, A., and Rahnenfuhrer, J. (2010). topGO: enrichment analysis for gene ontology. *R*  
325         *package version 2(0)*.
- 326 Andrews, S. (2010). FastQC: a quality control tool for high throughput sequence data.  
327         Available online at: <http://www.bioinformatics.babraham.ac.uk/projects/fastqc>
- 328 Anthony, K. R., Kline, D. I., Diaz-Pulido, G., Dove, S., and Hoegh-Guldberg, O. (2008).  
329         Ocean acidification causes bleaching and productivity loss in coral reef builders.  
330         *Proceedings of the National Academy of Sciences* 105(45), 17442-17446.
- 331 Banaszak, A., and Trench, R. (1996). Effects of ultraviolet (UV) radiation on marine  
332         microalgal-invertebrate symbioses. I. Response of the algal symbionts in culture and  
333         in hospite. *Oceanographic Literature Review* 8(43), 816.
- 334 Barbrook, A. C., Voolstra, C. R., and Howe, C. J. (2014). The chloroplast genome of a  
335         *Symbiodinium* sp. clade C3 isolate. *Protist*, 165(1), 1-13.

- 336 Barshis, D. J., Ladner, J. T., Oliver, T. A., Seneca, F. O., Traylor-Knowles, N., and Palumbi, S.  
337 R. (2013). Genomic basis for coral resilience to climate change. *Proceedings of the*  
338 *National Academy of Sciences* 110(4), 1387-1392.
- 339 Bayer, T., Aranda, M., Sunagawa, S., Yum, L. K., DeSalvo, M. K., Lindquist, E., et al. (2012).  
340 *Symbiodinium* transcriptomes: genome insights into the dinoflagellate symbionts of  
341 reef-building corals. *PloS one* 7(4), e35269.
- 342 Benjamini, Y., and Hochberg, Y. (1995). Controlling the false discovery rate: a practical and  
343 powerful approach to multiple testing. *Journal of the Royal Statistical Society. Series*  
344 *B (Methodological)*, 289-300.
- 345 Bolger, A. M., Lohse, M., and Usadel, B. (2014). Trimmomatic: a flexible trimmer for  
346 Illumina sequence data. *Bioinformatics* 30(15), 2114-2120.
- 347 Chen, P.-Y., Chen, C.-C., Chu, L., and McCarl, B. (2015). Evaluating the economic damage of  
348 climate change on global coral reefs. *Global Environmental Change* 30, 12-20.
- 349 Chomczynski, P., and Sacchi, N. (1987). Single-step method of RNA isolation by acid  
350 guanidinium thiocyanate-phenol-chloroform extraction. *Analytical Biochemistry*  
351 162(1), 156-159.
- 352 Cornwall, C. E., and Hurd, C. L. (2016). Experimental design in ocean acidification research:  
353 problems and solutions. *ICES Journal of Marine Science* 73(3), 572-581.
- 354 Crawley, A., Kline, D. I., Dunn, S., Anthony, K. E. N., & Dove, S. (2010). The effect of ocean  
355 acidification on symbiont photorespiration and productivity in *Acropora*  
356 *formosa*. *Global Change Biology*, 16(2), 851-863.

- 357 Cyronak, T., Schulz, K. G., and Jokiel, P. L. (2015). The Omega myth: what really drives  
358 lower calcification rates in an acidifying ocean. *ICES Journal of Marine Science:*  
359 *Journal du Conseil* 73(3), 558-562.
- 360 Davies, S. W., Marchetti, A., Ries, J. B., and Castillo, K. D. (2016). Thermal and pCO<sub>2</sub> stress  
361 elicit divergent transcriptomic responses in a resilient coral. *Frontiers in Marine*  
362 *Science* 3, 112.
- 363 De'ath, G., Lough, J. M., and Fabricius, K. E. (2009). Declining coral calcification on the  
364 Great Barrier Reef. *Science* 323(5910), 116-119.
- 365 Downs, C., Fauth, J. E., Halas, J. C., Dustan, P., Bemiss, J., and Woodley, C. M. (2002).  
366 Oxidative stress and seasonal coral bleaching. *Free Radical Biology and Medicine*  
367 33(4), 533-543.
- 368 Dunn, C. W., Howison, M., and Zapata, F. (2013). Agalma: an automated phylogenomics  
369 workflow. *BMC Bioinformatics* 14(1), 330.
- 370 Francis, W. R., Christianson, L. M., Kiko, R., Powers, M. L., Shaner, N. C., and Haddock, S.  
371 H. (2013). A comparison across non-model animals suggests an optimal sequencing  
372 depth for de novo transcriptome assembly. *BMC Genomics* 14(1), 167.
- 373 Goecks, J., Nekrutenko, A., and Taylor, J. (2010). Galaxy: a comprehensive approach for  
374 supporting accessible, reproducible, and transparent computational research in the life  
375 sciences. *Genome Biology* 11(8), R86.
- 376 Grabherr, M. G., Haas, B. J., Yassour, M., Levin, J. Z., Thompson, D. A., Amit, I., et al.  
377 (2011). Full-length transcriptome assembly from RNA-Seq data without a reference  
378 genome. *Nature Biotechnology* 29(7), 644-652.

- 379 Green, D. W., Padula, M. P., Santos, J., Chou, J., Milthorpe, B., and Ben-Nissan, B. (2013). A  
380 therapeutic potential for marine skeletal proteins in bone regeneration. *Marine Drugs*  
381 11(4), 1203-1220.
- 382 Hoadley, K. D., Pettay, D. T., Grottoli, A. G., Cai, W.-J., Melman, T. F., Schoepf, V., et al.  
383 (2015). Physiological response to elevated temperature and pCO<sub>2</sub> varies across four  
384 Pacific coral species: Understanding the unique host+symbiont response. *Scientific*  
385 *Reports* 5, 18371.
- 386 Hoegh-Guldberg, O., Mumby, P. J., Hooten, A. J., Steneck, R. S., Greenfield, P., Gomez, E., et  
387 al. (2007). Coral reefs under rapid climate change and ocean acidification. *Science*  
388 318(5857), 1737-1742.
- 389 Holcomb, M., Venn, A., Tambutte, E., Tambutte, S., Allemand, D., Trotter, J., et al. (2014).  
390 Coral calcifying fluid pH dictates response to ocean acidification. *Scientific Reports* 4,  
391 5207.
- 392 Jokiel, P., Rodgers, K., Kuffner, I., Andersson, A., Cox, E., and Mackenzie, F. (2008). Ocean  
393 acidification and calcifying reef organisms: a mesocosm investigation. *Coral Reefs*  
394 27(3), 473-483.
- 395 Kaniewska, P., Campbell, P. R., Kline, D. I., Rodriguez-Lanetty, M., Miller, D. J., Dove, S., et  
396 al. (2012). Major cellular and physiological impacts of ocean acidification on a reef  
397 building coral. *PloS one* 7(4), e34659.
- 398 Kleypas, J. A., Feely, R. A., Fabry, V. J., Langdon, C., Sabine, C. L., and Robbins, L. L.  
399 (2005). Impacts of ocean acidification on coral reefs and other marine calcifiers: a  
400 guide for future research. *Report of a workshop held* 18, 20.

- 401 Krief, S., Hendy, E. J., Fine, M., Yam, R., Meibom, A., Foster, G. L., et al. (2010).  
402 Physiological and isotopic responses of scleractinian corals to ocean acidification.  
403 *Geochimica et Cosmochimica Acta* 74(17), 4988-5001.
- 404 Langmead, B., Trapnell, C., Pop, M., & Salzberg, S. L. (2009). Ultrafast and memory-  
405 efficient alignment of short DNA sequences to the human genome. *Genome*  
406 *Biology*, 10(3), R25.
- 407 Kurman, M. D., Gómez, C. E., Georgian, S. E., Lunden, J. J., Cordes, E. E. (2017). Intra-  
408 specific variation reveals potential for adaptation to ocean acidification in a cold-water  
409 coral from the Gulf of Mexico. *Frontier in Marine Science*, 4, 111.
- 410 Love, M. I., Huber, W., and Anders, S. (2014). Moderated estimation of fold change and  
411 dispersion for RNA-seq data with DESeq2. *Genome Biology* 15(12), 550.
- 412 Loya, Y., Sakai, K., Yamazato, K., Nakano, Y., Sambali, H., and van Woesik, R. (2001). Coral  
413 bleaching: the winners and the losers. *Ecology Letters* 4(2), 122-131.
- 414 Mayfield, A. B., Wang, Y. B., Chen, C. S., Lin, C. Y., and Chen, S. H. (2014). Compartment-  
415 specific transcriptomics in a reef-building coral exposed to elevated temperatures.  
416 *Molecular Ecology* 23(23), 5816-5830.
- 417 McCulloch, M., Falter, J., Trotter, J., and Montagna, P. (2012). Coral resilience to ocean  
418 acidification and global warming through pH up-regulation. *Nature Climate Change*  
419 2(8), 623-627.
- 420 Moberg, F., and Folke, C. (1999). Ecological goods and services of coral reef ecosystems.  
421 *Ecological Economics* 29(2), 215-233.

- 422 Morita, M., Suwa, R., Iguchi, A., Nakamura, M., Shimada, K., Sakai, K., et al. (2010). Ocean  
423 acidification reduces sperm flagellar motility in broadcast spawning reef invertebrates.  
424 *Zygote* 18(02), 103-107.
- 425 Moya, A., Huisman, L., Ball, E., Hayward, D., Grasso, L., Chua, C., et al. (2012). Whole  
426 transcriptome analysis of the coral *Acropora millepora* reveals complex responses to  
427 CO<sub>2</sub>-driven acidification during the initiation of calcification. *Molecular Ecology*  
428 21(10), 2440-2454.
- 429 Moya, A., Huisman, L., Foret, S., Gattuso, J. P., Hayward, D. C., Ball, E., et al. (2015). Rapid  
430 acclimation of juvenile corals to CO<sub>2</sub>-mediated acidification by upregulation of heat  
431 shock protein and Bcl-2 genes. *Molecular Ecology* 24(2), 438-452.
- 432 Nakamura, M., Ohki, S., Suzuki, A., and Sakai, K. (2011). Coral larvae under ocean  
433 acidification: survival, metabolism, and metamorphosis. *PLoS One* 6(1), e14521.
- 434 Oksanen, J. (2001). Logic of experiments in ecology: is pseudoreplication a pseudoissue?  
435 *Oikos* 94(1), 27-38.
- 436 Oksanen, J., Blanchet, F. G., Kindt, R., Legendre, P., Minchin, P. R., O'hara, R. B., et al.  
437 (2013). Package 'vegan'. *Community Ecology Package* 2(9).
- 438 Parizi, A. M., Oryan, A., Shafiei-Sarvestani, Z., and Bigham, A. (2012). Human platelet rich  
439 plasma plus Persian Gulf coral effects on experimental bone healing in rabbit model:  
440 radiological, histological, macroscopical and biomechanical evaluation. *Journal of*  
441 *Materials Science: Materials in Medicine* 23(2), 473-483.
- 442 Parra, G., Bradnam, K., and Korf, I. (2007). CEGMA: a pipeline to accurately annotate core  
443 genes in eukaryotic genomes. *Bioinformatics* 23(9), 1061-1067.

- 444 Riebesell, U., Fabry, V. J., Hansson, L., and Gattuso, J.-P. (2011). Guide to best practices for  
445 ocean acidification research and data reporting. Office for Official Publications of the  
446 European Communities.
- 447 Rucker, M. M., Noonan, S., Humphrey, C., Moya, A., Willis, B. L., and Bay, L. K. (2015).  
448 Expression of calcification and metabolism-related genes in response to elevated pCO<sub>2</sub>  
449 and temperature in the reef-building coral *Acropora millepora*. *Marine Genomics* 24,  
450 313-318.
- 451 Rodolfo-Metalpa, R., Houlbrèque, F., Tambutté, É., Boisson, F., Baggini, C., Patti, F. P., et al.  
452 (2011). Coral and mollusc resistance to ocean acidification adversely affected by  
453 warming. *Nature Climate Change* 1(6), 308-312.
- 454 Schank, C. J. and Koehnle, T. J. (2009). Pseudoreplication is a pseudoproblem. *Journal of*  
455 *Comparative Psychology* 123(4), 421-433.
- 456 Seneca, F. O., and Palumbi, S. R. (2015). The role of transcriptome resilience in resistance of  
457 corals to bleaching. *Molecular Ecology* 24(7), 1467-1484.
- 458 Shinzato, C., Inoue, M., and Kusakabe, M. (2014). A snapshot of a coral “holobiont”: a  
459 transcriptome assembly of the scleractinian coral, *Porites*, captures a wide variety of  
460 genes from both the host and symbiotic zooxanthellae. *PloS one* 9(1), e85182.
- 461 Shinzato, C., Shoguchi, E., Kawashima, T., Hamada, M., Hisata, K., Tanaka, M., et al. (2011).  
462 Using the *Acropora digitifera* genome to understand coral responses to environmental  
463 change. *Nature* 476(7360), 320-323.
- 464 Shoguchi, E., Shinzato, C., Kawashima, T., Gyoja, F., Mungpakdee, S., Koyanagi, R., et al.  
465 (2013). Draft assembly of the *Symbiodinium minutum* nuclear genome reveals  
466 dinoflagellate gene structure. *Current Biology* 23(15), 1399-1408.

- 467 Sun, J., Chen, Q., Lun, J. C., Xu, J., and Qiu, J.-W. (2013). PearnBase: development of a  
468 transcriptomic database for the brain coral *Platygyra carnosus*. *Marine Biotechnology*  
469 15(2), 244-251.
- 470 Suwa, R., Nakamura, M., Morita, M., Shimada, K., Iguchi, A., Sakai, K., et al. (2010). Effects  
471 of acidified seawater on early life stages of scleractinian corals (Genus *Acropora*).  
472 *Fisheries Science* 76(1), 93-99.
- 473 Venn, A. A., Tambutté, E., Holcomb, M., Laurent, J., Allemand, D., and Tambutté, S. (2013).  
474 Impact of seawater acidification on pH at the tissue–skeleton interface and  
475 calcification in reef corals. *Proceedings of the National Academy of Sciences* 110(5),  
476 1634-1639.
- 477 Von Euw, S., Zhang, Q., Manichev, V., Murali, N., Gross, J., Feldman, L. C., et al. (2017).  
478 Biological control of aragonite formation in stony corals. *Science* 356(6341), 933-938.
- 479 Yuan, C., Zhou, Z., Zhang, Y., Chen, G., Yu, X., Ni, X., et al. (2017). Effects of elevated  
480 ammonium on the transcriptome of the stony coral *Pocillopora damicornis*. *Marine*  
481 *Pollution Bulletin* 114(1), 46-52.



## 9 Supplementary Material

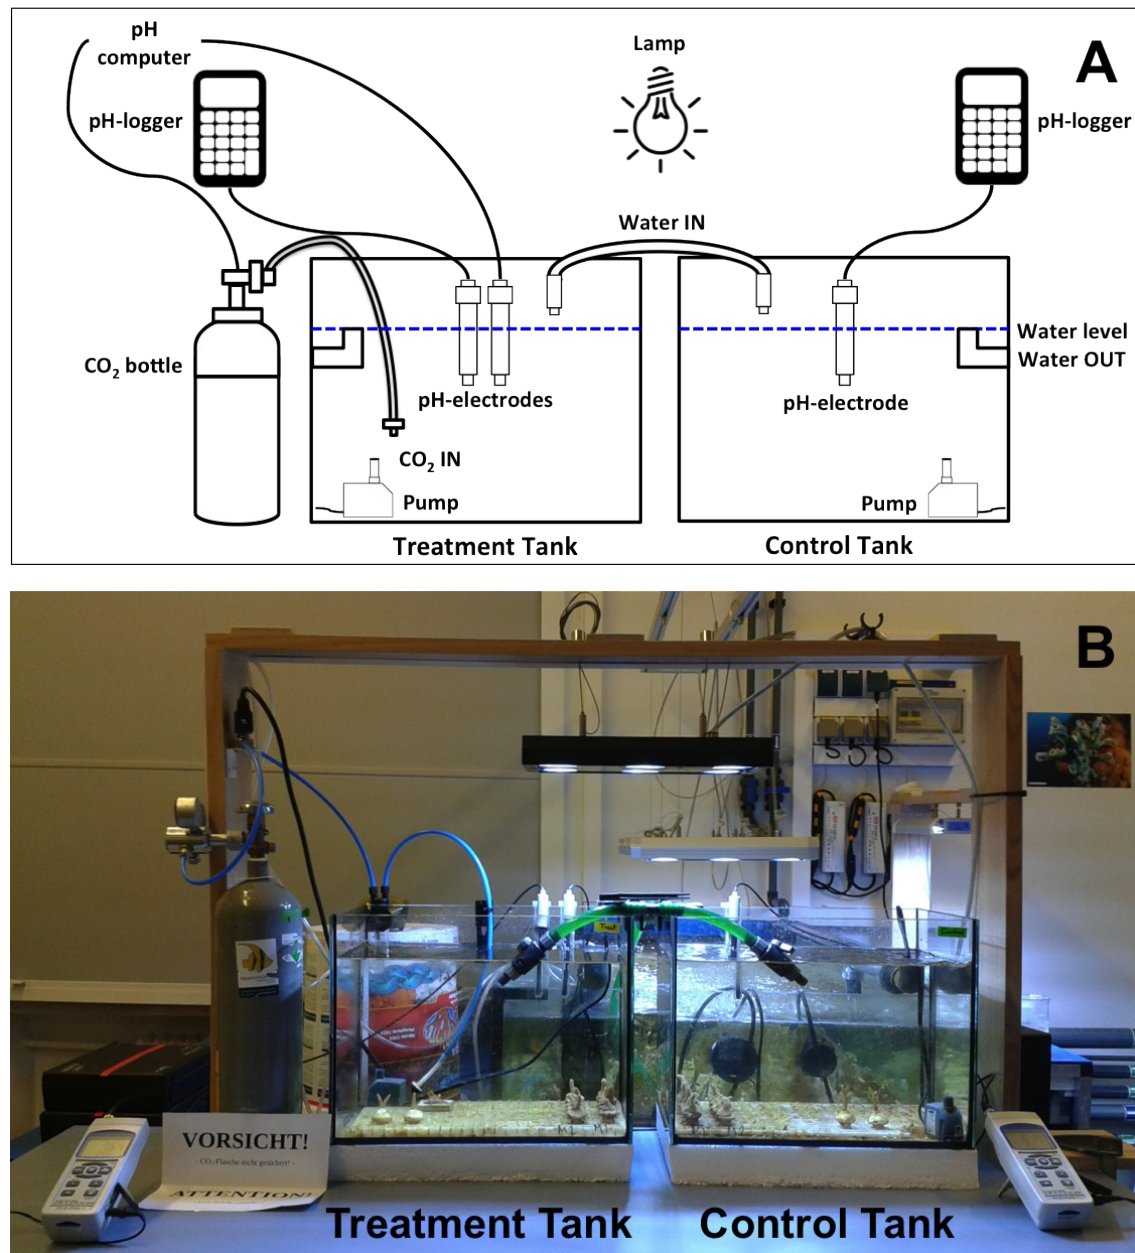

**Fig. S1 (A)** Diagram of the aquaria setup. To the left is the treatment tank (pH = 7.6) and to the right the control tank (pH = 8.0 pH). Water from one of the main water systems of the aquarium room flowed into the tanks (water IN) and back again to the big aquarium (water OUT). The acidified water returning to the big aquarium from the treatment tank was treated by letting it flow through a 25 cm column containing limestone grains with diameters ranging from 2 to 5 mm and injecting air with a flow rate from 300 to 500 L/h to cast out the carbon dioxide. pH of the treatment tank was kept at 7.6 by an automated mechanism that injected CO<sub>2</sub> from a bottle whenever the pH went above this value. During the experiment, pH was recorded with data loggers plugged to pH-electrodes in each tank. Water pumps kept recirculating the water, particularly important for the well mixing of CO<sub>2</sub> in the treatment tank. A Mitras LX 6200-HV lamp simulating the natural daily light cycles in the tropics was placed above and between the two tanks such that the illuminance was equally distributed. **(B)** A photograph of the actual aquaria setup.

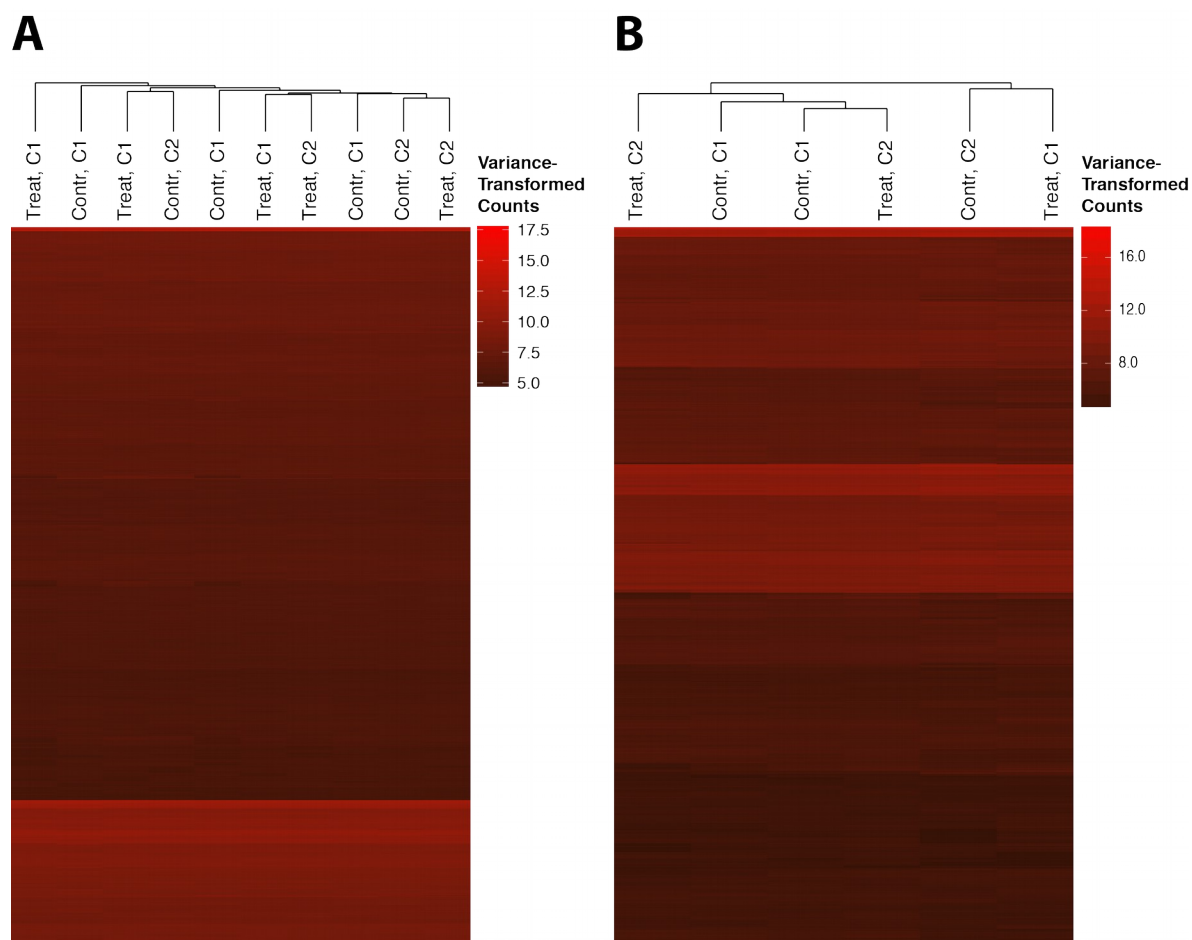

**Fig. S2** Heatmaps of the transformed counts (using the variance stabilizing normalization of DESeq2) of mapped reads per gene of the coral host at the first (**A**) and second (**B**) sampling times. Each column represents a sample and each row a gene. Dendrograms at the top of the plots cluster the samples by average. Genes are sorted by decreasing variance from top to bottom. Most of the genes with the highest expression values in the coral after three days of exposure to low pH were amongst the least variable (**A**).

**Table S1.** Completeness of reference transcriptomes based on comparison with the 248 genes in the Core Eukaryotic Genes Dataset (CEGMA). CEG: Core Eukaryotic Genes.

| <b>Category</b>                     | <b>Coral transcriptome</b> | <b>Symbiont transcriptome</b> |
|-------------------------------------|----------------------------|-------------------------------|
| CEG with hits                       | 222                        | 197                           |
| High-confidence full-length matches | 150                        | 104                           |
| Probable full-length matches        | 7                          | 5                             |
| CEG slightly shorter than query     | 5                          | 2                             |
| CEG much shorter than query         | 31                         | 33                            |
| Probable miss-assemblies            | 25                         | 51                            |
| CEG much longer than query          | 4                          | 2                             |
| CEG with no hits                    | 26                         | 51                            |

**Table S2.** DEG in the coral host after a three-days exposure to low (7.6) pH, including gene group identifier, log<sub>2</sub>-fold change, corrected p-value, protein domains found in predicted proteins and corresponding annotation.

| Isogroup          | Log <sub>2</sub> -FC | P <sub>adj</sub> | Pfam Domain(s) [E-val]                       | Annotation                                                                                         |
|-------------------|----------------------|------------------|----------------------------------------------|----------------------------------------------------------------------------------------------------|
| TR57464 <br>c0_g1 | 0.73                 | 0.00025865<br>7  | Astacin [1.7e-64]                            | Zinc metalloproteinase nas-14                                                                      |
| TR3854 c8_g1      | -0.70                | 0.00021718<br>1  | OLF [2.2e-33]                                | Noelin                                                                                             |
| TR12191 <br>c4_g3 | -0.64                | 0.00378190<br>9  | NA                                           | NA                                                                                                 |
| TR55829 <br>c4_g3 | 0.60                 | 0.02163614<br>9  | NA                                           | NA                                                                                                 |
| TR8304 <br>c10_g2 | -0.59                | 0.02044362<br>1  | NA                                           | NA                                                                                                 |
| TR25513 <br>c0_g1 | 0.57                 | 0.02286719<br>2  | DUF4772 [9.3e-22],<br>53-BP1_Tudor [4.4e-05] | Zinc finger protein 395                                                                            |
| TR5422 c1_g1      | -0.56                | 0.02163614<br>9  | NA                                           | NA                                                                                                 |
| TR47269 <br>c9_g2 | -0.56                | 0.02044362<br>1  | Rve [5.8e-21]                                | Uncharacterized protein K02A2.6                                                                    |
| TR17622 <br>c0_g2 | -0.55                | 0.02492151<br>7  | Ets [8.1e-35]                                | ETS domain-containing protein Elk-1                                                                |
| TR4348 c4_g1      | -0.54                | 0.04991696<br>9  | NA                                           | NA                                                                                                 |
| TR50981 <br>c7_g3 | -0.53                | 0.02044362<br>1  | TNFR_c6 [1.9e-04]                            | NA                                                                                                 |
| TR60375 <br>c5_g4 | -0.52                | 0.04926036<br>7  | HSP20 [4.6e-19]                              | Heat shock protein Hsp-16.1/Hsp-16.11, Alpha-crystallin B chain                                    |
| TR21650 <br>c1_g1 | -0.50                | 0.01680226<br>2  | NA                                           | Protein with a platelet-derived and vascular endothelial growth factors (PDGF, VEGF) family domain |
| TR28829 <br>c0_g1 | -0.46                | 0.04926036<br>7  | ELFV_dehydrog_N [3.4e-51]                    | NADP-specific glutamate dehydrogenase                                                              |
| TR25128 <br>c7_g1 | 0.46                 | 0.01680226<br>2  | NA                                           | NA                                                                                                 |
| TR1763 c4_g1      | -0.42                | 0.02286719<br>2  | RRM_1 [2e-10]                                | Peroxisome proliferator-activated receptor gamma coactivator-related-like protein                  |
| TR1853 c1_g2      | 0.40                 | 0.02044362<br>1  | NA                                           | Protein with RNA/DNA binding domains                                                               |
| TR21661 <br>c1_g1 | 0.38                 | 0.03404108<br>1  | Helicase_C [1.1e-47]                         | Werner syndrome ATP-dependent helicase-like protein                                                |
